# Supplementary material
Source: Royal Society of Chemistry journal article supplement (doi:10.1039/d6cy00111d)
Supplement: d6cy00111d1.pdf [file d6cy00111d1.pdf]

## Supporting Information

### Planar $\text{ReN}_1\text{S}_1$ Sites with Dual $\sigma$ -Channels Drive High-Performance $\text{CO}_2$ Photoreduction

Hao Sheng,<sup>a</sup> Shaokui Chen,<sup>b</sup> Guocheng Huang,<sup>a</sup> Jialong Lv,<sup>a</sup> Guiting Huang,<sup>a</sup> Wenjun Yang,<sup>a</sup> Ziyang Chen,<sup>a</sup> Shaoyu Wu,<sup>a</sup> Yueling Chen<sup>ac\*</sup> and Jinhong Bi<sup>ac\*</sup>

<sup>a</sup> *Department of Environmental Science and Engineering, Fuzhou University, Minhou, Fujian 350108, China*

<sup>b</sup> *Department of Materials Science and Engineering, Fuzhou University, Minhou, Fujian 350108, China*

<sup>c</sup> *State Key Laboratory of Photocatalysis on Energy and Environment, Fuzhou University, Minhou, Fujian 350108, China*

*\* Corresponding authors*

*\*E-mail address: 221310035@fzu.edu.cn (Y. Chen), bijinhong@fzu.edu.cn (J. Bi).*

## Characterization

Powder X-ray diffraction (PXRD) patterns were collected using Rigaku MiniFlex 600 X-ray diffractometer. Fourier transform infrared (FT-IR) spectra were acquired on Thermo Scientific Nicolet iS10 spectrometer. The  $^{13}\text{C}$  nuclear magnetic resonance ( $^{13}\text{C}$  NMR),  $^1\text{H}$  nuclear magnetic resonance ( $^1\text{H}$  NMR) and X-ray photoelectron spectroscopy (XPS) experiments were carried out on Bruker Avance III 500 and PHI Quantum 2000 XPS system, respectively. All binding energies were referenced to the C 1s peak (284.6 eV) of the surface adventitious carbon. The Brunauer-Emmett-Teller (BET) surface areas were determined by an ASAP 2020 apparatus (Micromeritics Instrument Corp.). Scanning electron microscopy (SEM) and high-resolution transmission electron microscopy (TEM) analyses were carried out by Nova Nano SEM 230 microscopy (FEI Corp.) and Tecnai G2 F20 microscope (FEI Corp.). The aberration-corrected high-angle annular dark-field scanning transmission electron microscopy (AC-HAADF-STEM) was performed with FEI Theims Z. Inductively coupled plasma atomic emission spectroscopy (ICP-AES) analysis was applied to measure the real loading amount of Re in catalysts on ICAP XSERIES2. The UV-vis diffuse reflectance spectroscopy (UV-vis DRS) was determined on Agilent Cary 5000 UV-Vis-NIR spectrophotometer using  $\text{BaSO}_4$  as a reference. The photoelectrochemical measurements were measured using a conventional three-electrode system, where platinum plate and Ag/AgCl electrode were counter and reference electrode, respectively. The working electrode was prepared by depositing 10  $\mu\text{L}$  of a thoroughly mixed suspension containing 5 mg catalyst and 0.5 mL ethanol onto a Fluoride-doped oxide (FTO) glass substrate (0.25  $\text{cm}^2$ ), with the exposed area covered with epoxy and then dried at room temperature. Mott-Schottky measurements and Electrochemical impedance spectroscopy (EIS) analyses were performed using a ZAHNER IM6 electrochemical workstation, with 0.2  $\text{mol}\cdot\text{L}^{-1}$   $\text{Na}_2\text{SO}_4$  aqueous solution and a mixed aqueous electrolyte of 5  $\text{mmol}\cdot\text{L}^{-1}$   $\text{K}_3[\text{Fe}(\text{CN})_6]$ /5  $\text{mmol}\cdot\text{L}^{-1}$   $\text{K}_4[\text{Fe}(\text{CN})_6]$ /0.1  $\text{mol}\cdot\text{L}^{-1}$  KCl employed for the two tests, respectively. Photocurrent measurements were recorded using a CHI650E electrochemical workstation in 0.2  $\text{mol}\cdot\text{L}^{-1}$   $\text{Na}_2\text{SO}_4$  aqueous solution, under irradiation with a 300 W Xe lamp equipped with a 420 nm cutoff filter. Room-temperature Photoluminescence (PL) spectra were collected using an Edinburgh FL/FS900 spectrophotometer (excitation wavelength: 420 nm). The  $E_b$  was calculated by fitting the integrated PL emission as a function of temperature according to Arrhenius equation, i.e.,  $I(T) = I_0/(1 + A \exp(-E_b/k_B T))$ . Temperature-dependent photoluminescence (TDPL) spectra and time-resolved photoluminescence (TRPL) decay spectroscopy were retrieved with a FLS1000 under 420 nm pulsed laser-diode excitation. The linear sweep voltammetry (LSV) curves were measured using a ZAHNER IM6 electrochemical workstation in 0.2  $\text{mol}\cdot\text{L}^{-1}$   $\text{Na}_2\text{SO}_4$  aqueous solution; Ar was continuously bubbled into the electrolyte to maintain either an Ar-saturated or  $\text{CO}_2$ -saturated environment.  $\text{CO}_2$  temperature-programmed desorption ( $\text{CO}_2$ -TPD) experiments were conducted on an AutoChem II analyzer (Micromeritics Instrument Corp.), with the temperature gradually increasing to 250  $^\circ\text{C}$  at a ramping rate of 10  $^\circ\text{C}\cdot\text{min}^{-1}$ . *In situ* Fourier transform infrared (*in situ* FT-IR) spectroscopy measurements were performed using a Thermo Scientific Nicolet iS10 spectrometer.

## Theoretical calculations

The HOMO and LUMO orbital diagrams and electrostatic potential (ESP) analyses were obtained using Multiwfn program and visualized using Visual Molecular Dynamics (VMD, version 1.9.3, available at: <http://www.ks.uiuc.edu/Research/vmd/>) program. The density functional theory (DFT) calculations were performed using the Vienna Ab initio Simulation Package (VASP 5.4). A plane-wave basis set with an energy cutoff of 420 eV was employed, and the Gaussian smearing width was set to 0.2 eV. The Brillouin zone was sampled using a  $3 \times 3 \times 1$  K points. All atomic structures were relaxed until the force convergence criterion of  $0.01 \text{ eV} \cdot \text{\AA}^{-1}$  was satisfied.

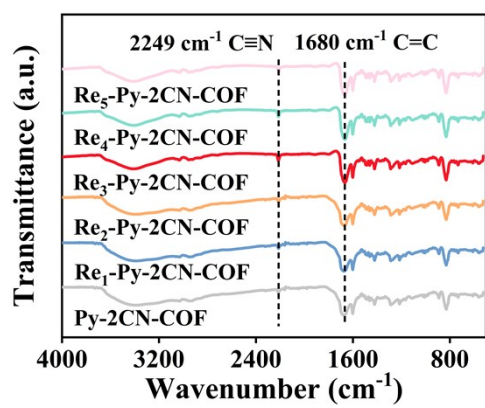

Fig. S1. The FT-IR spectra of Py-2CN-COF and Re<sub>x</sub>-Py-2CN-COF (x=1, 2, 3, 4, 5).

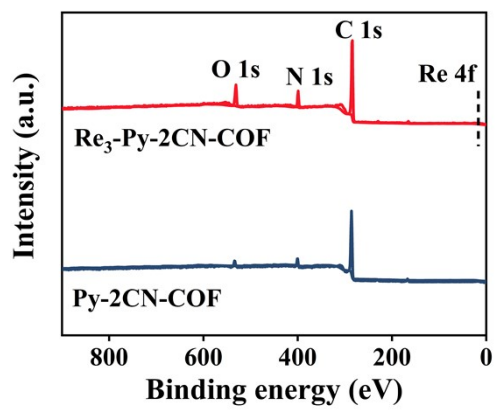

Fig. S2. The XPS survey spectrum for Py-2CN-COF and Re<sub>3</sub>-Py-2CN-COF.

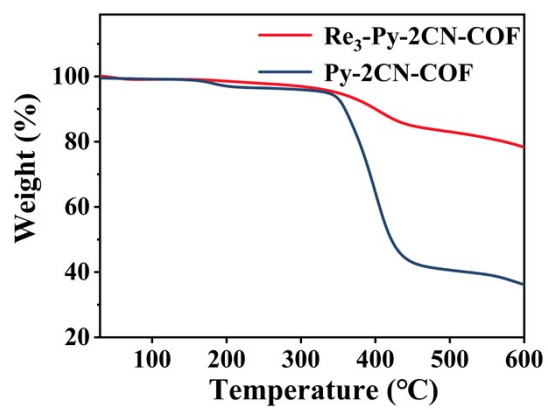

Fig. S3. The TGA of Py-2CN-COF and  $\text{Re}_3\text{-Py-2CN-COF}$ .

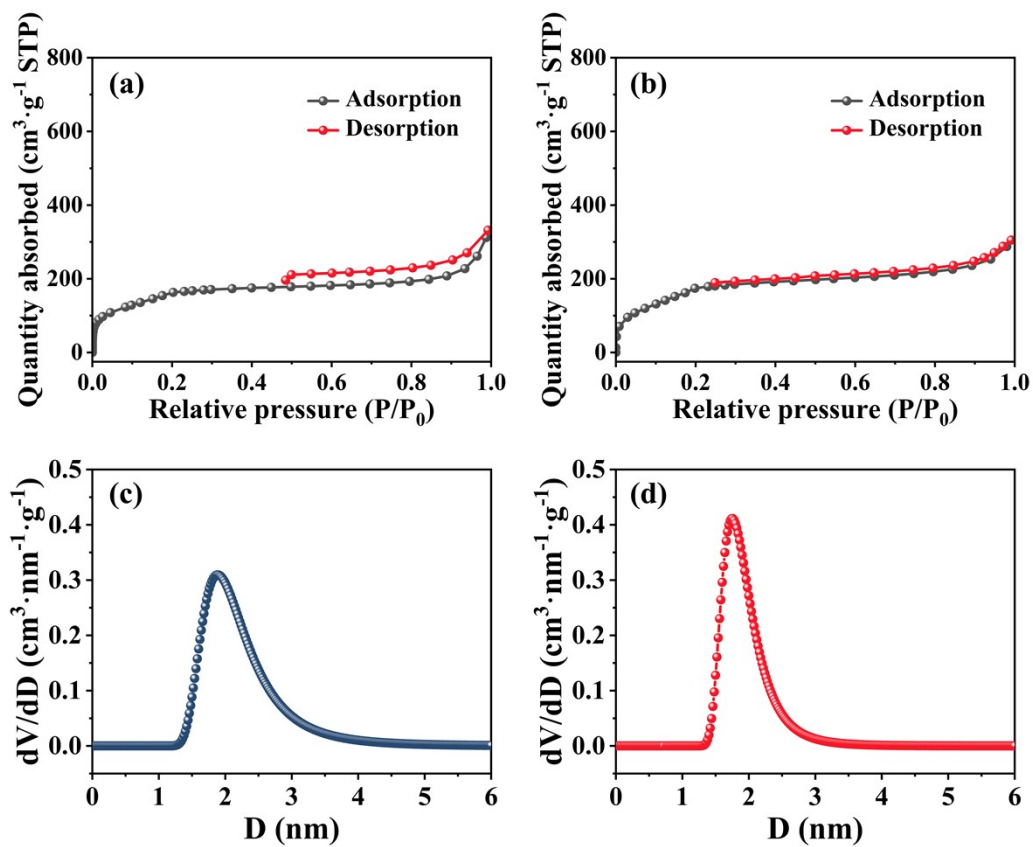

Fig. S4. The nitrogen adsorption-desorption isotherm curves of (a) Py-2CN-COF (b) Re<sub>3</sub>-Py-2CN-COF and the pore size distribution plots of (c) Py-2CN-COF (d) Re<sub>3</sub>-Py-

2CN-COF.

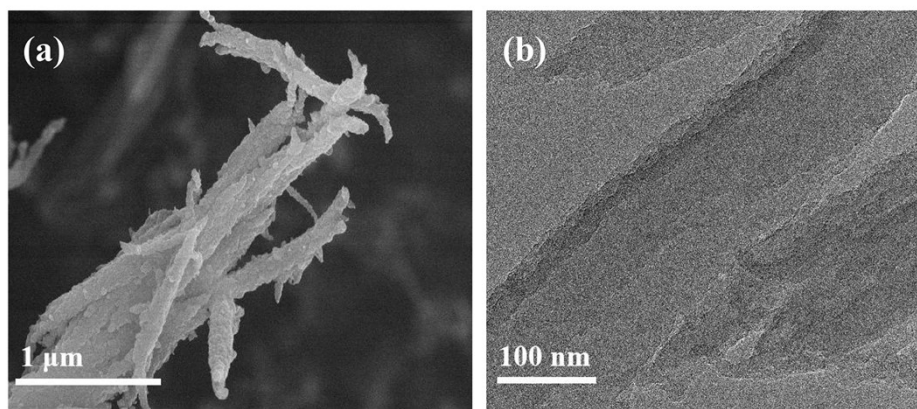

**Fig. S5.** (a) The SEM and (b) TEM images of Py-2CN-COF.

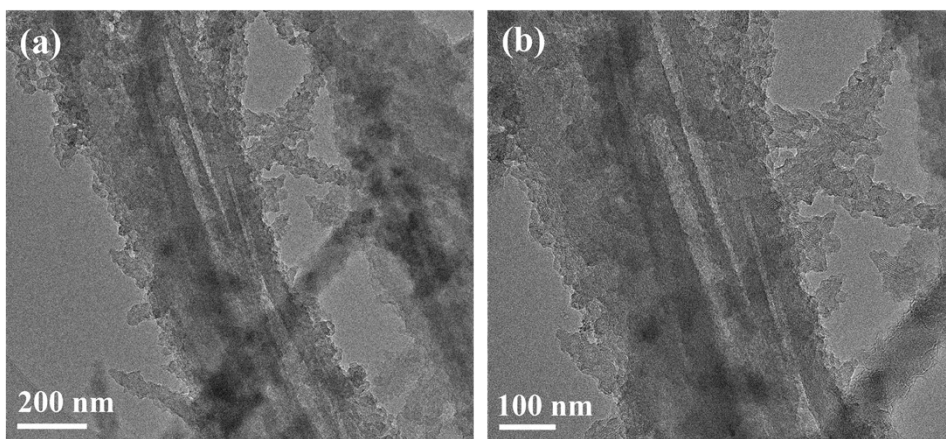

**Figure. S6.** (a,b) TEM images of Re<sub>5</sub>-Py-2CN-COF at different magnifications.

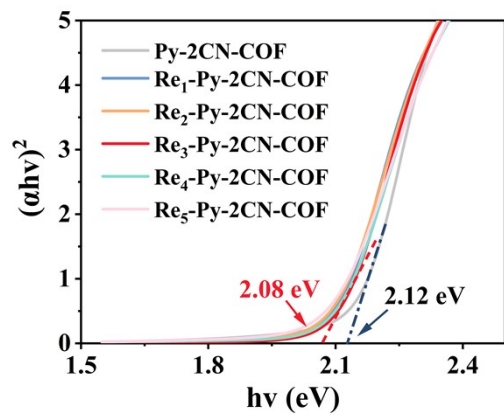

Fig. S7. The tauc plot of Py-2CN-COF and Re<sub>x</sub>-Py-2CN-COF (x = 1, 2, 3, 4, 5).

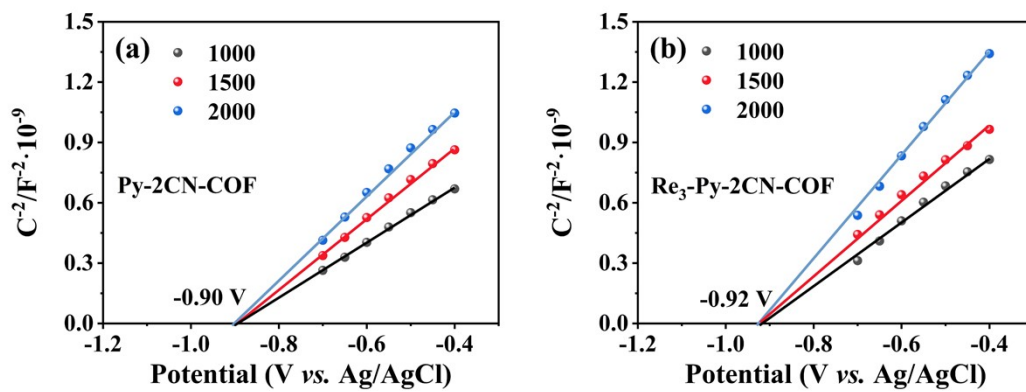

Fig. S8. The Mott-Schottky plots of (a) Py-2CN-COF and (b) Re<sub>3</sub>-Py-2CN-COF.

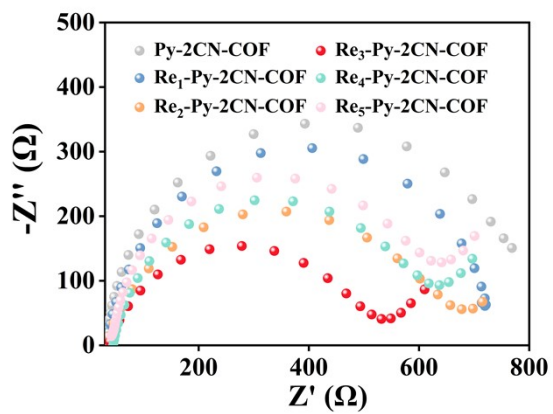

Fig. S9. The EIS plot of Py-2CN-COF and Re<sub>x</sub>-Py-2CN-COF (x = 1, 2, 3, 4, 5).

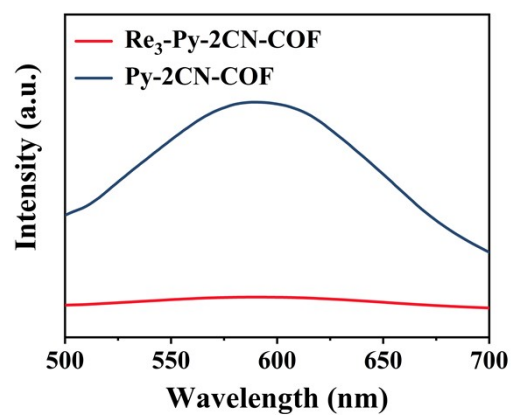

Fig. S10. Steady-state PL spectroscopy of  $\text{Py-2CN-COF}$  and  $\text{Re}_3\text{-Py-2CN-COF}$ .

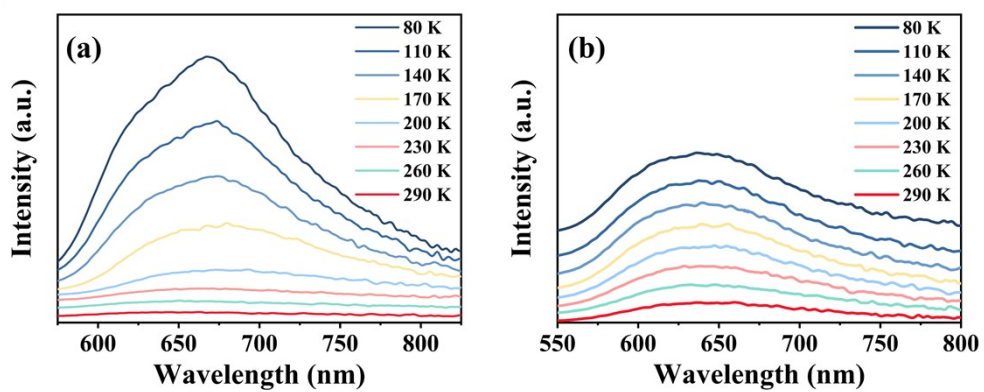

Fig. S11. TDPL spectra with excitation wavelength at 420 nm of (a) Py-2CN-COF and (b) Re<sub>3</sub>-Py-2CN-COF.

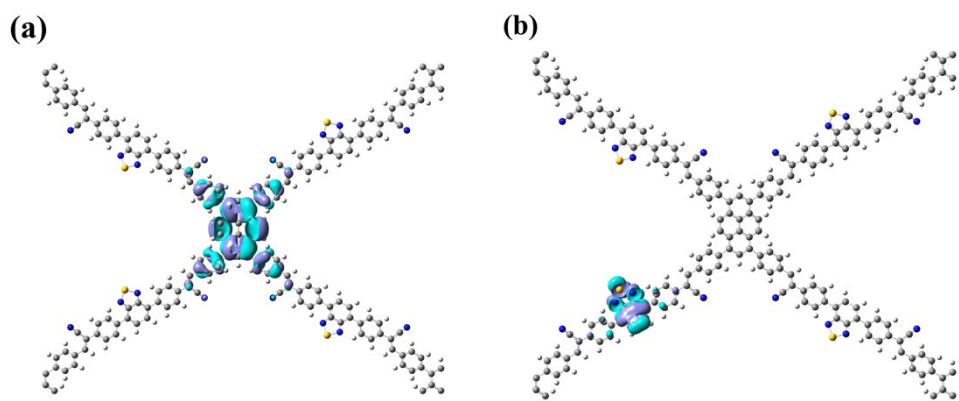

Fig. S12. The (a) HOMO and (b) LUMO orbital diagrams of Py-2CN-COF.

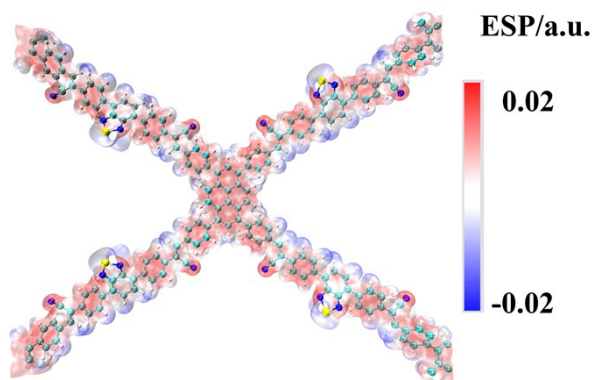

Fig. S13. The ESP plot of Py-2CN-COF.

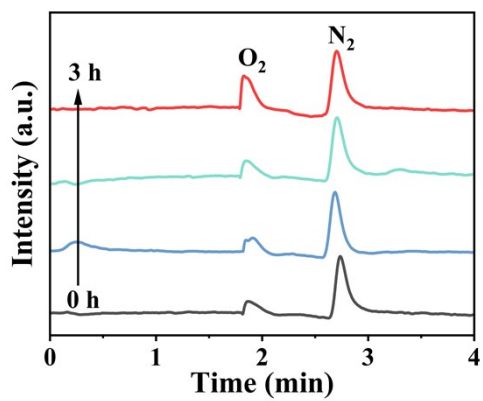

Fig. S14. The O<sub>2</sub> and N<sub>2</sub> peak plots of Re<sub>3</sub>-Py-2CN-COF under the photocatalytic CO<sub>2</sub> reduction.

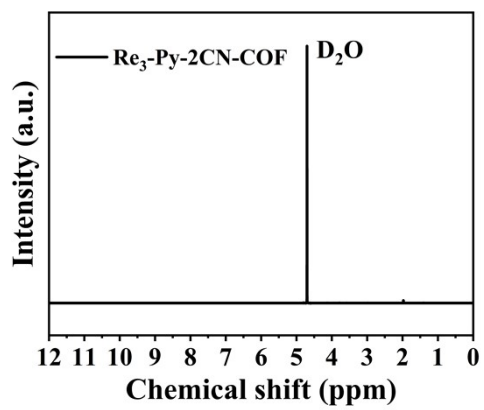

Fig. S15.  $^1\text{H}$  NMR spectrum of the liquid product of  $\text{CO}_2\text{RR}$  by  $\text{Re}_3\text{-Py-2CN-COF}$ .

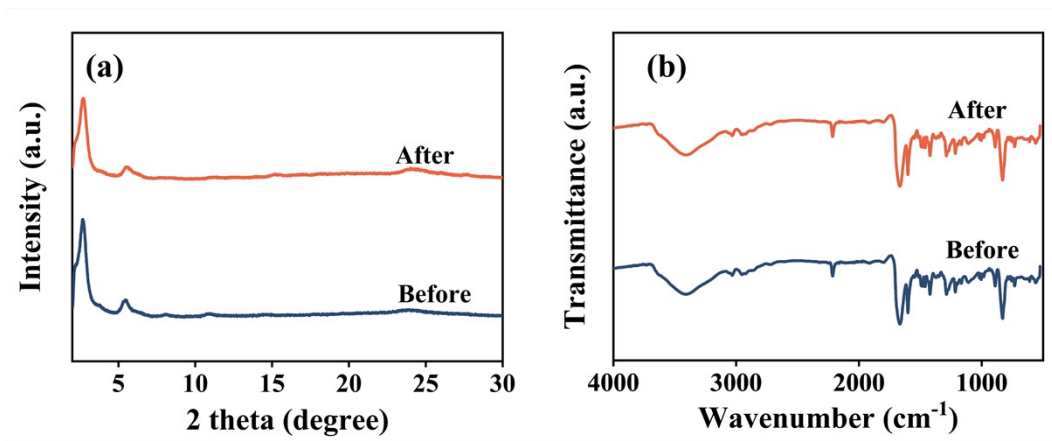

Fig. S16. (a) The PXRD pattern and (b) FT-IR spectra of samples before and after the reaction.

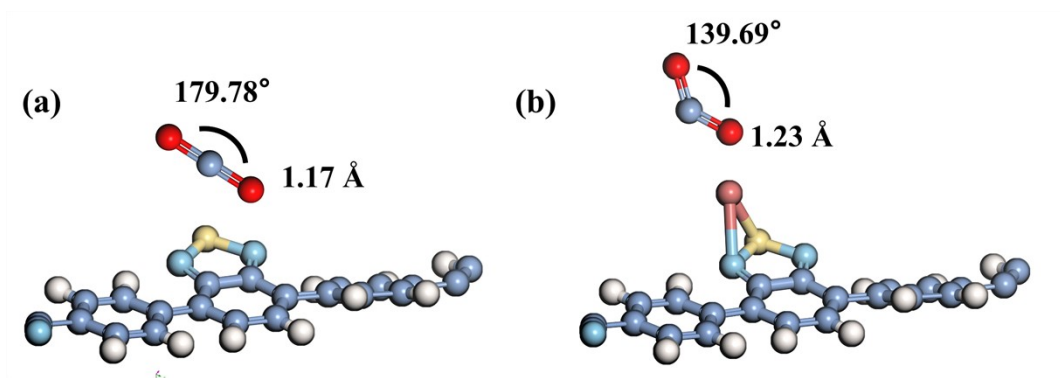

**Fig. S17.** The adsorption configuration of (a) Re<sub>3</sub>-Py-2CN-COF and (b) Py-2CN-COF.

**Table. S1.** The BET surface area and pore size of Py-2CN-COF and Re<sub>3</sub>-Py-2CN-COF.

| <b>Catalysts</b>            | <b>BET surface area (m<sup>2</sup>/g)</b> | <b>Pore size (nm)</b> |
|-----------------------------|-------------------------------------------|-----------------------|
| Py-2CN-COF                  | 666.07                                    | 1.88                  |
| Re <sub>3</sub> -Py-2CN-COF | 603.35                                    | 1.76                  |

**Table. S2.** The selectivity of products of Py-2CN-COF and Re<sub>x</sub>-Py-2CN-COF (x =1, 2, 3, 4, 5) from CO<sub>2</sub>.

| Catalysts                   | CO (%) | CH <sub>4</sub> (%) |
|-----------------------------|--------|---------------------|
| Py-2CN-COF                  | 85.5   | 14.5                |
| Re <sub>1</sub> -Py-2CN-COF | 90.6   | 9.4                 |
| Re <sub>2</sub> -Py-2CN-COF | 91.2   | 8.8                 |
| Re <sub>3</sub> -Py-2CN-COF | 92.3   | 7.7                 |
| Re <sub>4</sub> -Py-2CN-COF | 92.0   | 8.0                 |
| Re <sub>5</sub> -Py-2CN-COF | 91.3   | 8.7                 |

**Table S3.** Summary of recently reported photocatalytic CO<sub>2</sub> reduction properties of photocatalysts.

| Photocatalysts                       | Products        | Conditions                           | Yield rate ( $\mu\text{mol}^{-1}\cdot\text{g}^{-1}\cdot\text{h}^{-1}$ ) | Light                    | Ref.      |
|--------------------------------------|-----------------|--------------------------------------|-------------------------------------------------------------------------|--------------------------|-----------|
| Re <sub>3</sub> -Py-2CN-COF          | CO              | Ionic Liquid/H <sub>2</sub> O        | 119.5                                                                   | $\lambda \geq 420$<br>nm | This work |
| BTT-bpy-COF-Re                       | CO              | H <sub>2</sub> O                     | 110.9                                                                   | $\lambda \geq 420$<br>nm | 1         |
| COF-Co-N <sub>4</sub>                | CO              | H <sub>2</sub> O                     | 110.3                                                                   | $\lambda \geq 420$<br>nm | 2         |
| Mn <sub>1</sub> /PCN-N <sub>v</sub>  | CO              | H <sub>2</sub> O                     | 29.63                                                                   | $\lambda \geq 420$<br>nm | 3         |
| Ni-tp-COF                            | CO              | H <sub>2</sub> O                     | 15.0                                                                    | $\lambda \geq 420$<br>nm | 4         |
| CuDAPP-TP-COF                        | CO              | H <sub>2</sub> O                     | 47.1                                                                    | $\lambda \geq 420$<br>nm | 5         |
| Ce(tmhd) <sub>4</sub>                | CO              | Ru(bpy) <sub>3</sub> Cl <sub>2</sub> | 86                                                                      | $\lambda \geq 420$<br>nm | 6         |
| CHt/V <sub>5</sub> -ZIS              | CO              | H <sub>2</sub> O                     | 73.3                                                                    | $\lambda \geq 420$<br>nm | 7         |
| Cu-Bpy-COF                           | CH <sub>4</sub> | TEA、H <sub>2</sub> O                 | 70                                                                      | $\lambda \geq 420$<br>nm | 8         |
| AuNPs@SiO <sub>2</sub> -AuNCs        | CO              | H <sub>2</sub> O                     | 64.8                                                                    | $\lambda \geq 420$<br>nm | 9         |
| N <sub>3</sub> -COF-MoS <sub>2</sub> | CO              | H <sub>2</sub> O                     | 28                                                                      | $\lambda \geq 420$<br>nm | 10        |

## References

1. H. Dong, H. Che, L. Bai, N. Zhang, Y. Tian, B. Li, Y. Wang, X. Zhang and F. Zhang, *Inorg. Chem.*, 2024, **63**, 24421-24428.
2. S. Xia, Y. Liu, R. Zhu, J. Feng, W. Han and Z. Gu, *Macromol. Rapid Commun.*, 2025, **46**, e2400780.
3. H. Zhao, R. Bi, M. Ju, H. Wang, R. Chen, X. Zhu and Q. Liao, *J. Phys. Chem. Lett.*, 2025, **16**, 9370-9380.
4. P. Wang, Y. Dai, Z. Song, Y. Wang, J. Wei, Z. Liu, Y. Ma, F. Yang, J. Qu, S. Liu, Y. Cai, X. Yang, C. Li and J. Hu, *Chem. Eng. J.*, 2025, **511**, 162084.
5. Y. Hou, H. Ma, D. Zhu, R. Li, Z. Zhao, C. Li, C. Cui and J. Wang, *Dalton Trans.*, 2024, **54**, 405-413.
6. Y. Zhao, J. Zhang, H. Wang, R. Zhang, Y. Teng, M. Li, Y. Song and Z. Tan, *Chem. Commun.*, 2024, **60**, 12433-12436.
7. S. Yuan, Y. Feng, S. Liang, Y. Zhang, J. Zhao, Y. Wang, P. Yang and Q. Gu, *Mater. Today Energy*, 2025, **48**, 101814.
8. Y. Zhang, L. Cao, G. Bai and X. Lan, *Small*, 2023, **19**, e2300035.
9. J. Fang, J. Li, Y. Chen, J. Cheng, C. Zhu and J. Mao, *Inorg. Chem.*, 2024, **63**, 19375-19381.
10. J. Ning, Q. Niu, Z. Liu and L. Li, *Green Chem.*, 2025, **27**, 6804-6812.
